# Supplementary material for: Dietary Intake of Essential, Toxic, and Potentially Toxic Elements from Mussels (Mytilus spp.) in the Spanish Population: A Nutritional Assessment
Source: PubMed Central journal article supplement (PMC6521244; doi:10.3390/nu11040864), 2019-04-17
Supplement: nutrients-11-00864-s001.pdf [file nutrients-11-00864-s001.pdf]

**Supplementary Table 1. Concentrations of rare earth elements and other minority elements in mussels from different types of conservation in the Spanish market. Median values are expressed in ng/g<sub>fresh weight</sub>**

|    | Preserved mussels<br>(n=88) | Frozen mussels<br>(n=80) | Fresh mussels<br>(n = 20) |
|----|-----------------------------|--------------------------|---------------------------|
| Ce | 49,2                        | 35,8                     | 460,3                     |
| Dy | 4,0                         | 4,8                      | 0,0                       |
| Er | 1,8                         | 2,6                      | 19,5                      |
| Eu | 0,0                         | 4,0                      | 13,7                      |
| Ga | 7,4                         | 21,0                     | 87,1                      |
| Gd | 5,8                         | 7,2                      | 66,1                      |
| Ho | 0,8                         | 1,0                      | 0,0                       |
| In | 0,0                         | 0,2                      | 0,0                       |
| La | 28,9                        | 21,4                     | 297,1                     |
| Lu | 0,0                         | 0,5                      | 2,0                       |
| Nb | 3,2                         | 3,9                      | 29,7                      |
| Nd | 24,6                        | 22,5                     | 253,4                     |
| Pr | 6,3                         | 5,0                      | 61,0                      |
| Sm | 6,3                         | 5,3                      | 54,8                      |
| Ta | 0,0                         | 0,3                      | 0,0                       |
| Tb | 0,0                         | 3,8                      | 9,4                       |
| Tm | 0,0                         | 1,1                      | 2,5                       |
| Y  | 0,0                         | 49,7                     | 266,6                     |
| Yb | 0,0                         | 4,4                      | 12,8                      |

**Supplementary Table 1. Concentrations of essential and toxic elements in mussels from three different production areas. Median values are expressed in ng/g<sub>fresh weight</sub>**

|                           | Production area<br>(n=80)  |                           |                                 |                             |
|---------------------------|----------------------------|---------------------------|---------------------------------|-----------------------------|
|                           | Galician samples<br>(n=36) | Chilean samples<br>(n=32) | New Zealander samples<br>(n=12) | <i>P value</i> <sup>a</sup> |
| <b>Essential elements</b> |                            |                           |                                 |                             |
| <b>Fe</b>                 | 36085.4                    | 30485.1                   | 55467.0                         | <0.005                      |

|                                                  |         |         |         |        |
|--------------------------------------------------|---------|---------|---------|--------|
| Zn                                               | 50710.0 | 47888.5 | 21337.5 | <0.005 |
| Cu                                               | 1644.0  | 1584.3  | 1021.3  | <0.005 |
| Se                                               | 1100.4  | 1116.9  | 861.0   | <0.05. |
| Mn                                               | 1341.5  | 1461.9  | 2188.7  | <0.005 |
| Mo                                               | 179.7   | 115.8   | 346.6   | <0.005 |
| Co                                               | 46.8    | 53.4    | 144.1   | <0.005 |
| <b>Major toxic elements</b>                      |         |         |         |        |
| As                                               | 3113.9  | 4484.5  | 6280.9  | <0.005 |
| Cd                                               | 283.8   | 535.4   | 587.0   | <0.005 |
| Hg                                               | 17.7    | 5.9     | 21.7    | <0.005 |
| Pb                                               | 266.8   | 18.9    | 77.7    | <0.005 |
| <b>Other toxic or potentially toxic elements</b> |         |         |         |        |
| Ag                                               | 6.4     | 4.6     | 6.2     | <0.05  |
| Al                                               | 35882.4 | 26143.8 | 83801.8 | <0.005 |
| Ba                                               | 308.1   | 184.8   | 616.2   | <0.005 |
| Be                                               | 3.5     | 0.7     | 3.2     | <0.005 |
| Cr                                               | 117.4   | 58.8    | 141.4   | <0.005 |
| Ni                                               | 121.8   | 101.7   | 181.7   | <0.005 |
| Pd                                               | 0.1     | 0.1     | 0.1     | n.s.   |
| Sb                                               | 1.0     | 1.4     | 1.4     | n.s.   |
| Sn                                               | 16.9    | 5.5     | 5.4     | <0.01  |
| Sr                                               | 6999.0  | 6216.4  | 7649.2  | <0.05  |
| Th                                               | 7.4     | 1.5     | 10.4    | <0.005 |
| Tl                                               | 1.3     | 1.2     | 3.6     | <0.05  |
| U                                                | 32.0    | 38.8    | 26.4    | n.s.   |
| Sum REE <sup>a</sup>                             | 277.5   | 143.2   | 1498.8  | <0.005 |

<sup>a</sup> This is the sum of the individual concentrations of Ce, Dy, Er, Eu, Ga, Gd, Ho, In, La, Lu, Nb, Nd, Pr, Sm, Ta, Tb, Tm, Y, Yb

**Supplementary Table 2. Concentrations of essential and toxic elements in preserved mussels from name and store brands. Results are presented as median values and expressed in ng/g fresh weight**

|  | Name brands <sup>a</sup><br>(n=38) | Store brands <sup>a</sup><br>(n=34) | <i>P value</i> <sup>b</sup> |
|--|------------------------------------|-------------------------------------|-----------------------------|
|--|------------------------------------|-------------------------------------|-----------------------------|

| Essential elements                        |         |         |        |
|-------------------------------------------|---------|---------|--------|
| Fe                                        | 30671.1 | 35834.1 | <0.05  |
| Zn                                        | 37463.5 | 45988.8 | <0.05  |
| Cu                                        | 1200.9  | 1283.0  | n.s.   |
| Se                                        | 599.6   | 653.9   | n.s.   |
| Mn                                        | 1145.5  | 1249.1  | n.s.   |
| Mo                                        | 151.3   | 223.3   | n.s.   |
| Co                                        | 41.2    | 43.6    | n.s.   |
| Major toxic elements                      |         |         |        |
| As                                        | 1632.5  | 1969.1  | <0.01  |
| Cd                                        | 224.2   | 224.5   | n.s.   |
| Hg                                        | 11.2    | 12.5    | <0.05  |
| Pb                                        | 181.0   | 209.6   | n.s.   |
| Other toxic or potentially toxic elements |         |         |        |
| Ag                                        | 6.6     | 5.1     | <0.05  |
| Al                                        | 33950.0 | 33383.4 | n.s.   |
| Ba                                        | 335.9   | 248.5   | <0.01  |
| Be                                        | 3.3     | 1.0     | <0.01  |
| Cr                                        | 94.9    | 116.5   | <0.05  |
| Ni                                        | 94.2    | 111.6   | <0.005 |
| Pd                                        | 0.1     | 0.1     | n.s.   |
| Sb                                        | 1.4     | 1.0     | n.s.   |
| Sn                                        | 15.3    | 15.7    | n.s.   |
| Sr                                        | 7297.9  | 6116.6  | n.s.   |
| Th                                        | 7.3     | 2.7     | <0.01  |
| Tl                                        | 1.3     | 1.2     | n.s.   |
| U                                         | 33.7    | 34.2    | n.s.   |
| Sum REE <sup>c</sup>                      | 419.5   | 155.2   | <0.005 |

<sup>a</sup> This comparison was only possible between brands from Galician origin. because we could not find store brands from other origins

<sup>b</sup> Mann-Whitney test.

<sup>c</sup> This is the sum of the individual concentrations of Ce, Dy, Er, Eu, Ga, Gd, Ho, In, La, Lu, Nb, Nd, Pr, Sm, Ta, Tb, Tm, Y, Yb

n.s.: not significant.

**Supplementary Table 4. Concentrations of essential and toxic elements in frozen mussels produced under two different production methods. Median values are expressed in ng/g<sub>fresh weight</sub>**

|                                                  | Conventional production<br>(n=28) | Organic production<br>(n=8) | <i>P value</i> <sup>a</sup> |
|--------------------------------------------------|-----------------------------------|-----------------------------|-----------------------------|
| <b>Essential elements</b>                        |                                   |                             |                             |
| Fe                                               | 36439.6                           | 28740.1                     | n.s.                        |
| Zn                                               | 60867.4                           | 38803.3                     | < 0.01                      |
| Cu                                               | 1600.4                            | 1714.9                      | n.s.                        |
| Se                                               | 1034.4                            | 1168.3                      | n.s.                        |
| Mn                                               | 1344.4                            | 1051.4                      | <0.05                       |
| Mo                                               | 186.8                             | 153.8                       | <0.05                       |
| Co                                               | 47.4                              | 44.4                        | n.s.                        |
| <b>Major toxic elements</b>                      |                                   |                             |                             |
| As                                               | 3301.7                            | 2288.2                      | <0.005                      |
| Cd                                               | 282.8                             | 290.9                       | n.s.                        |
| Hg                                               | 18.0                              | 16.2                        | <0.05                       |
| Pb                                               | 272.5                             | 235.7                       | <0.05                       |
| <b>Other toxic or potentially toxic elements</b> |                                   |                             |                             |
| Ag                                               | 9.4                               | 7.1                         | <0.05                       |
| Al                                               | 58040.4                           | 75981.3                     | <0.01                       |
| Ba                                               | 590.6                             | 443.3                       | <0.05                       |
| Be                                               | 4.4                               | 4.9                         | n.s.                        |
| Cr                                               | 117.4                             | 104.1                       | n.s.                        |
| Ni                                               | 123.8                             | 110.4                       | n.s.                        |
| Pd                                               | 0.1                               | 0.1                         | n.s.                        |
| Sb                                               | 1.4                               | 1.4                         | n.s.                        |
| Sn                                               | 18.8                              | 20.4                        | n.s.                        |
| Sr                                               | 7218.9                            | 7496.7                      | n.s.                        |

|                      |       |       |       |
|----------------------|-------|-------|-------|
| Th                   | 16.9  | 18.9  | n.s.  |
| Tl                   | 1.7   | 1.9   | n.s.  |
| U                    | 40.9  | 32.8  | <0.05 |
| Sum REE <sup>a</sup> | 272.4 | 279.2 | n.s.  |

<sup>a</sup> This is the sum of the individual concentrations of Ce, Dy, Er, Eu, Ga, Gd, Ho, In, La, Lu, Nb, Nd, Pr, Sm, Ta, Tb, Tm, Y, Yb
